# Supplementary material
Source: PubMed Central journal article supplement (PMC3911035)
Supplement: AEM.02717-13_zam999104987so1.pdf [file AEM.02717-13_zam999104987so1.pdf]

1 **Table S1.** Minimal inhibitory concentrations (MIC) against *Staphylococcus aureus* for each  
2 compound used in the toxicity assay on *Artemia* sp nauplii. Data are based on literature  
3 studies.

| Compound            | MIC ( $\mu$ M) | Reference |
|---------------------|----------------|-----------|
| Andrimide           | 10             | (1)       |
| Holomycin           | 35             | (2)       |
| Indolmycin          | 10             | (3)       |
| Pentabromopseudilin | 20             | (4)       |
| TDA                 | 15             | (5)       |
| Violacein           | 25             | (6)       |

- 5
- 6 1. **Needham J, Kelly MT, Ishige M, Andersen RJ.** 1994. Andrimide and Moiramides  
7 A-C, metabolites produced in culture by a marine isolate of the bacterium  
8 *Pseudomonas fluorescens* – Structure elucidation and biosynthesis. *Journal of Organic*  
9 *Chemistry* **59**:2058-2063.
- 10 2. **Oliva B, O’Neill A, Wilson JM, O’Halon PJ, Chopra I.** 2001. Antimicrobial  
11 properties and mode of action of the pyrrothine holomycin. *Antimicrobial Agents and*  
12 *Chemotherapy* **45**:532-539.
- 13 3. **Hurdle JG, O’Neill AJ, Chopra I.** 2004. Anti-staphylococcal activity of indolmycin,  
14 a potential topical agent for control of staphylococcal infections. *Journal of*  
15 *Antimicrobial Chemotherapy* **54**:549-552.
- 16 4. **Raimondi MV, Cascioferro S, Schillaci D, Petruso S.** 2006. Synthesis and  
17 antimicrobial activity of new bromine-rich pyrrole derivatives related to  
18 monodeoxyyluteolin. *European Journal of Medicinal Chemistry* **41**:1439-1445.
- 19 5. **Porsby CH, Webber MA, Nielsen KF, Piddock LJV, Gram L.** 2011. Resistance  
20 and tolerance to tropodithietic acid, an antimicrobial in aquaculture, is hard to select.  
21 *Antimicrob . Ag. Chemother.* **55**:1332-1337.
- 22 6. **Cazoto LL, Martins D, Ribeiro MG, Duran N, Nakazato G.** 2011. Antibacterial  
23 activity of violacein against *Staphylococcus aureus* isolated from bovine mastitis.  
24 *Journal of Antibiotics* **64**:395-397.
- 25
